# Supplementary material for: The photo-/thermo-chromism of spiropyran in alkanes as a temperature abuse indicator in the cold chain of vaccines
Source: Royal Society of Chemistry journal article supplement (doi:10.1039/d0nj02975k), 2020-01-01
Supplement: d0nj02975k1.pdf [file d0nj02975k1.pdf]

Electronic Supplementary Material (ESI) for New Journal of Chemistry.

## Electronic Supplementary Information

### Photo-/thermo-chromism of Spiropyran in Alkanes as an Temperature Abuse Indicator in Cold Chain of Vaccines

Mei Gao, Chaofan Lian, Rang Xing, Jie Wang, Xuefei Wang\*, Zhiyuan Tian\*  
School of Chemistry Sciences, University of Chinese Academy of Sciences, Beijing, 100049,  
China

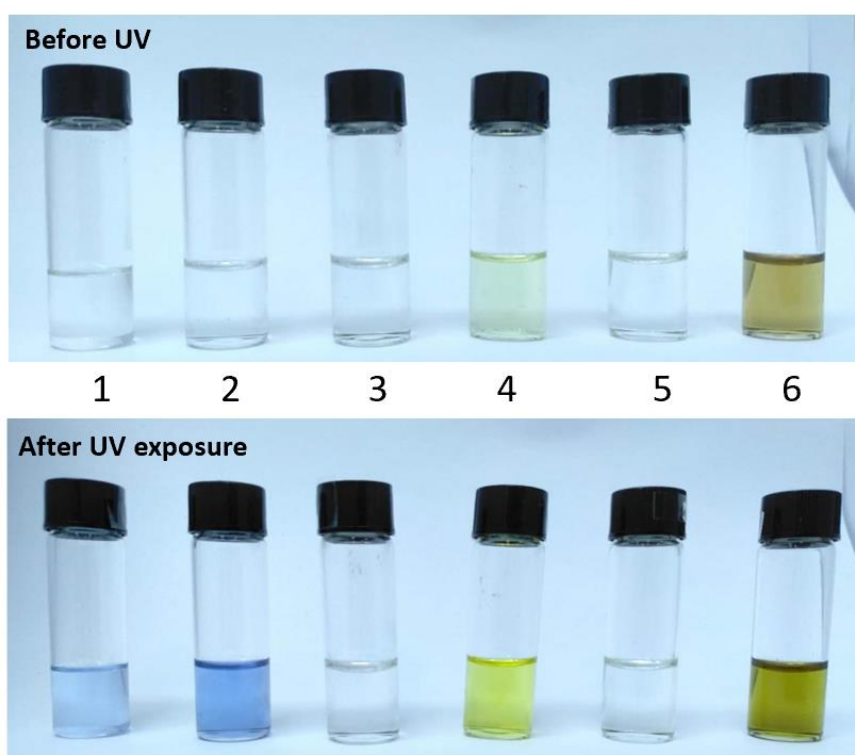

Fig. S1 Photochromism of SP1 in different solvents under UV exposure. Solvents:  
1=1,2-dibromoethane; 2=c-hexane; 3=formamide; 4=formic acid; 5=DMSO; 6=ethylenediamine.

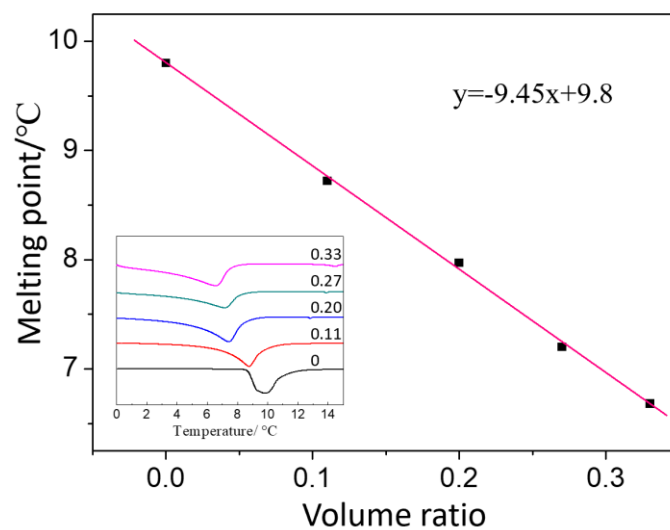

Fig. S2 The freezing point decrease upon the volume fraction of n-tetradecane in the mixture of n-tetradecane and n-pentadecane. The inset shows the corresponding DSC curves.

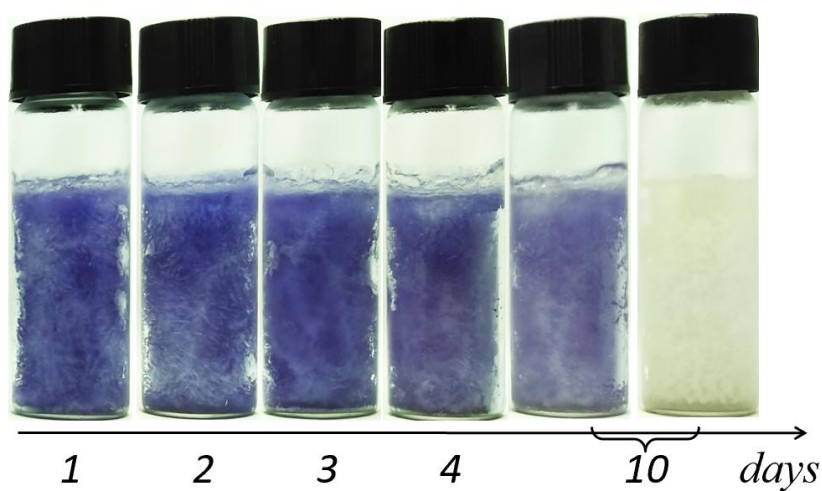

Fig. S3 Color changes of MC2 in frozen mixture of n-tetradecane and n-pentadecane (volume ratio 1:4) at 4°C. At the 10<sup>th</sup> day sample was melted and refrozen.

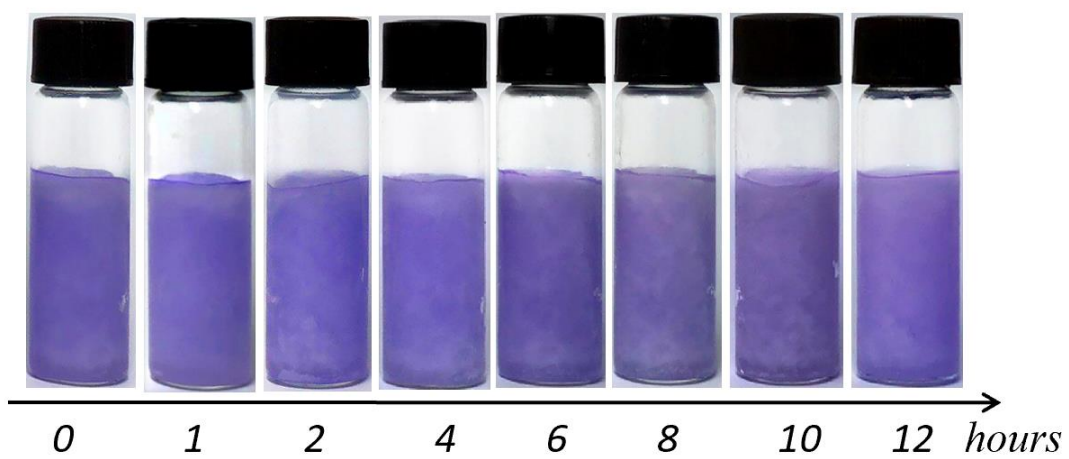

Fig. S4 MC1 in frozen mixture of c-tetradecane and n-pentadecane (volume ratio=1:4) at 4°C under visible light. Solution concentration: 30 µg/ml.
